# Supplementary material
Source: PubMed Central journal article supplement (PMC6825571)
Supplement: NIHMS1538409-supplement-1.pdf [file NIHMS1538409-supplement-1.pdf]

Table S1: Prebiotic Fiber Supplement Use by Colorectal Cancer Stage in the Women's Health Initiative 1998-2018 (n= 2,546).

| <b>Colorectal<br/>Cancer Stage<sup>a</sup></b> | <b>Prebiotic Fiber Supplement Use</b> |                       |                          |                            |
|------------------------------------------------|---------------------------------------|-----------------------|--------------------------|----------------------------|
|                                                | <b>Total<br/>n (%)</b>                | <b>None<br/>n (%)</b> | <b>Soluble<br/>n (%)</b> | <b>Insoluble<br/>n (%)</b> |
| <b>I</b>                                       | 73 (2.8)                              | 71 (2.8)              | 1 (1.1)                  | 1 (7.1)                    |
| <b>II</b>                                      | 1,119 (42.2)                          | 1,067 (41.9)          | 47 (50.5)                | 5 (35.7)                   |
| <b>III</b>                                     | 1,080 (40.7)                          | 1,044 (41.0)          | 30 (32.3)                | 6 (42.9)                   |
| <b>IV</b>                                      | 328 (12.4)                            | 312 (12.3)            | 14 (15.1)                | 2 (14.3)                   |
| <b>Unknown</b>                                 | 53 (2.0)                              | 52 (2.0)              | 1 (1.1)                  | 0 (0.0)                    |

<sup>a</sup>Cancer stage determined by available Surveillance, Epidemiology, and End Results Program (SEER) data, 379 cases were missing stage data.
